# Supplementary material
Source: publisher figshare collection journal article supplement (https://aacr.figshare.com/articles/dataset/_/23668555)
Supplement: Supplementary file 1 [file 41536738]

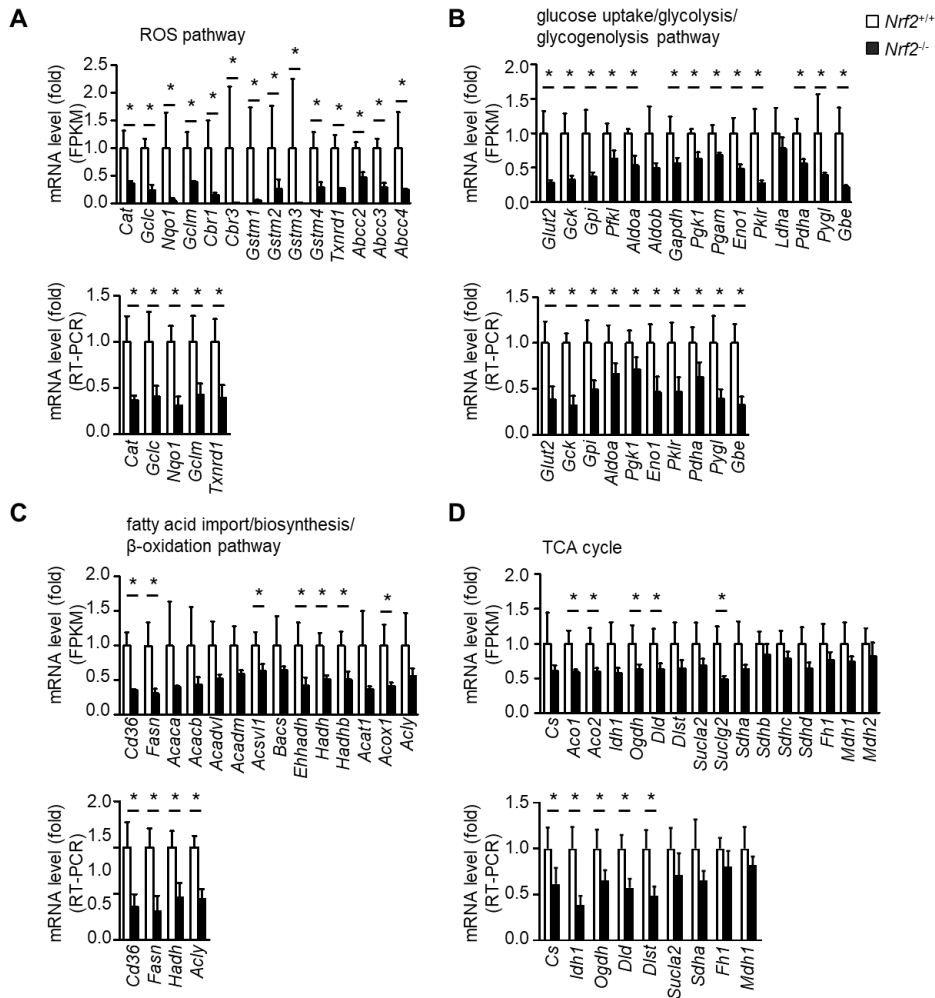

**Fig S1. *Nrf2* ablation affects gene expression in mouse liver tumors.** Expression signature (FPKM) (Top) and selected specific gene real-time PCR (bottom) of the core genes involved in ROS signaling pathway (A), glucose uptake/glycolysis/ glycogenolysis pathway (B), Fatty acid import/biosynthesis/ $\beta$ -oxidation pathway (C), and the TCA cycle (D) in *Nrf2*<sup>+/+</sup> and *Nrf2*<sup>-/-</sup> mouse liver tumors (n=3 mice per group for FPKM, n=6 independent experiments for q-PCR). Mouse 18s rRNA gene was used as an internal reference. For all panels, bars represent mean  $\pm$  SD. \* $p < 0.05$ .
